# Supplementary material for: Five 3D metal–organic frameworks constructed from V-shaped polycarboxylate acids and flexible imidazole-based ligands
Source: Royal Society of Chemistry journal article supplement (doi:10.1039/b913942g), 2009-12-04
Supplement: b913942g.pdf [file b913942g.pdf]

## Supplementary Information for:

# Five 3D Metal-Organic Frameworks Constructed From V-shaped Polycarboxylate Acids and Flexible Imidazole-Based Ligands

Guang-Xiang Liu,\*<sup>a</sup> Kun Zhu,<sup>a</sup> Huan-Min Xu,<sup>a</sup> Sadafumi Nishihara,<sup>b</sup> Rong-Yi Huang\*<sup>a</sup> and Xiao-Ming Ren<sup>a,c</sup>

<sup>a</sup>Anhui Key Laboratory of Functional Coordination Compounds, School of Chemistry and Chemical Engineering, Anqing Normal University, Anqing 246003, P. R. China

<sup>b</sup>Department of Physical Science, Graduate School of Science, Osaka Prefecture University, Sakai, Osaka 599-8531, Japan

<sup>c</sup>Department of Applied Chemistry, Science College, Nanjing University of Technology, Nanjing 210009, P. R. China

E-mail: liugx@live.com; huangrongyi@aqtc.edu.cn

**Table S1.** Distance [ $\text{\AA}$ ] and angles [ $^\circ$ ] of hydrogen bonding for complex **3**

| D-H...A        | $d(\text{D-H})$ | $d(\text{H}\cdots\text{A})$ | $d(\text{D}\cdots\text{A})$ | $\angle(\text{DHA})$ |
|----------------|-----------------|-----------------------------|-----------------------------|----------------------|
| O4-H4...O5     | 0.93            | 2.56                        | 2.928(7)                    | 104                  |
| C13-H13...O6   | 0.93            | 2.55                        | 2.913(7)                    | 103                  |
| C19-H19...O4#1 | 0.93            | 2.49                        | 3.093(7)                    | 123                  |

|                  |      |      |          |     |
|------------------|------|------|----------|-----|
| C23-H23···O2#2   | 0.93 | 2.58 | 3.091(7) | 115 |
| C26-H26A···O6#3  | 0.97 | 2.55 | 2.971(7) | 106 |
| C33-H33A···O2W#4 | 0.96 | 2.46 | 3.365(9) | 157 |
| C34-H34B···O5#5  | 0.96 | 2.48 | 3.364(9) | 153 |

Symmetry codes: #1  $3/2-x, 1-y, -1/2+z$ ; #2  $1-x, 1/2+y, 3/2-z$ ; #3  $1/2+x, 3/2-y, 1-z$ ; #4  $1/2-x, 1-y, 1/2+z$ ; #5  $1+x, 1+y, z$ .

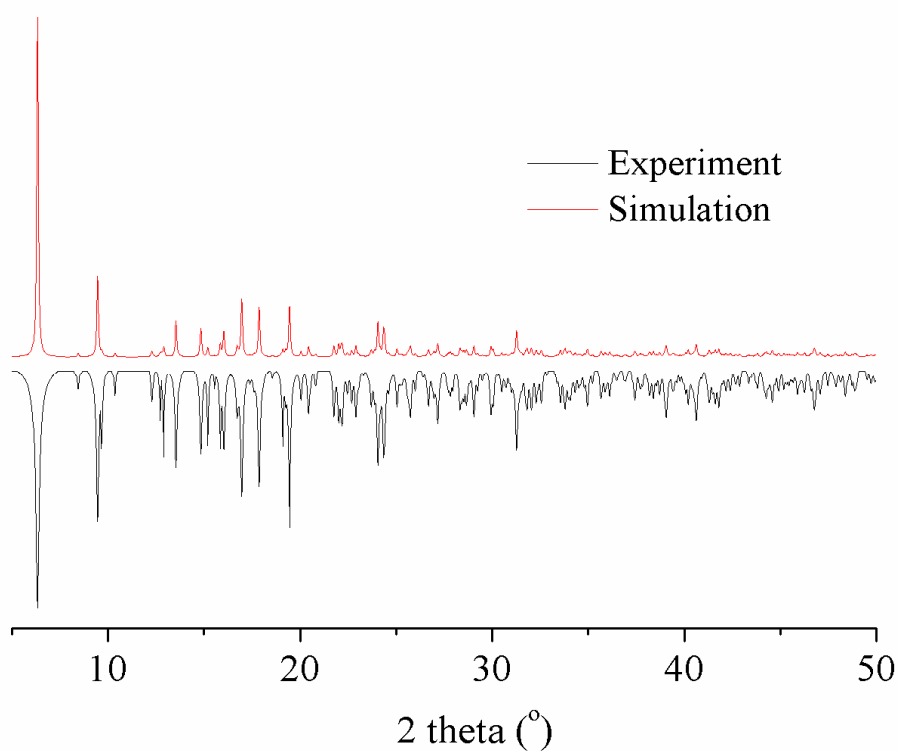

**Figure S1** X-Ray power diffraction profiles of complex **1**.

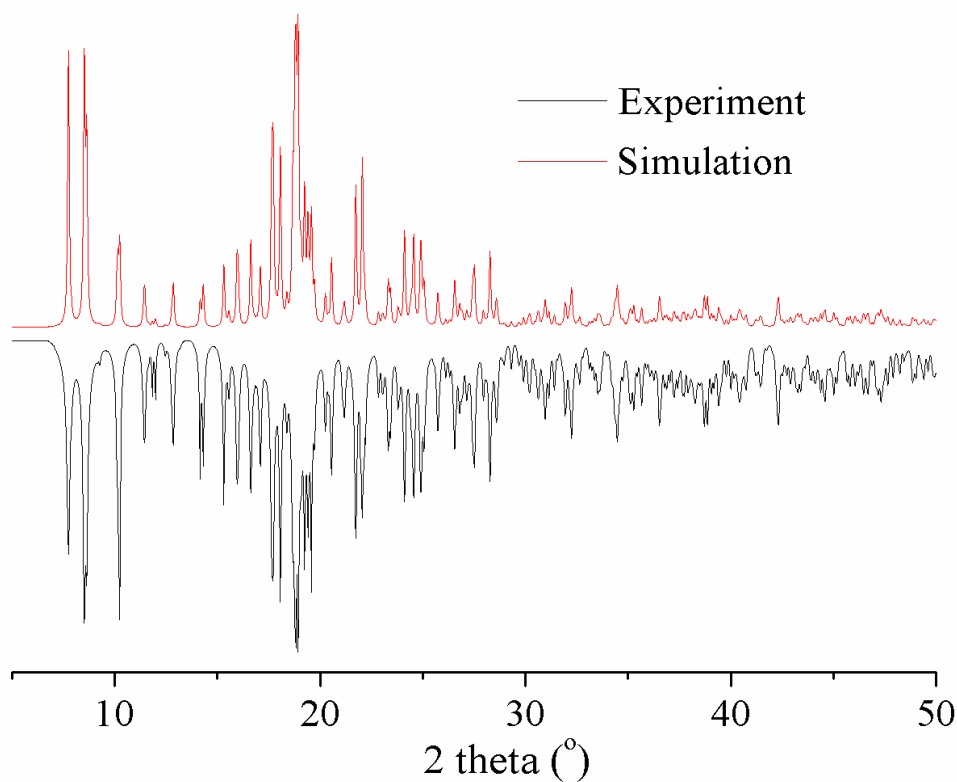

**Figure S2** X-Ray power diffraction profiles of complex 2.

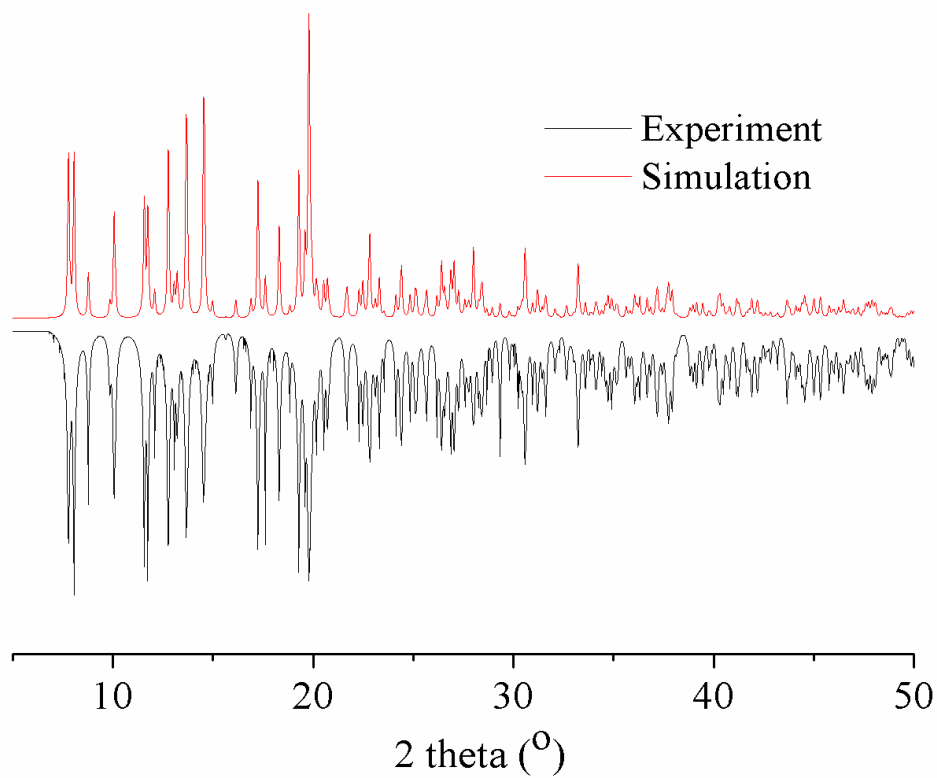

**Figure S3** X-Ray power diffraction profiles of complex 3.

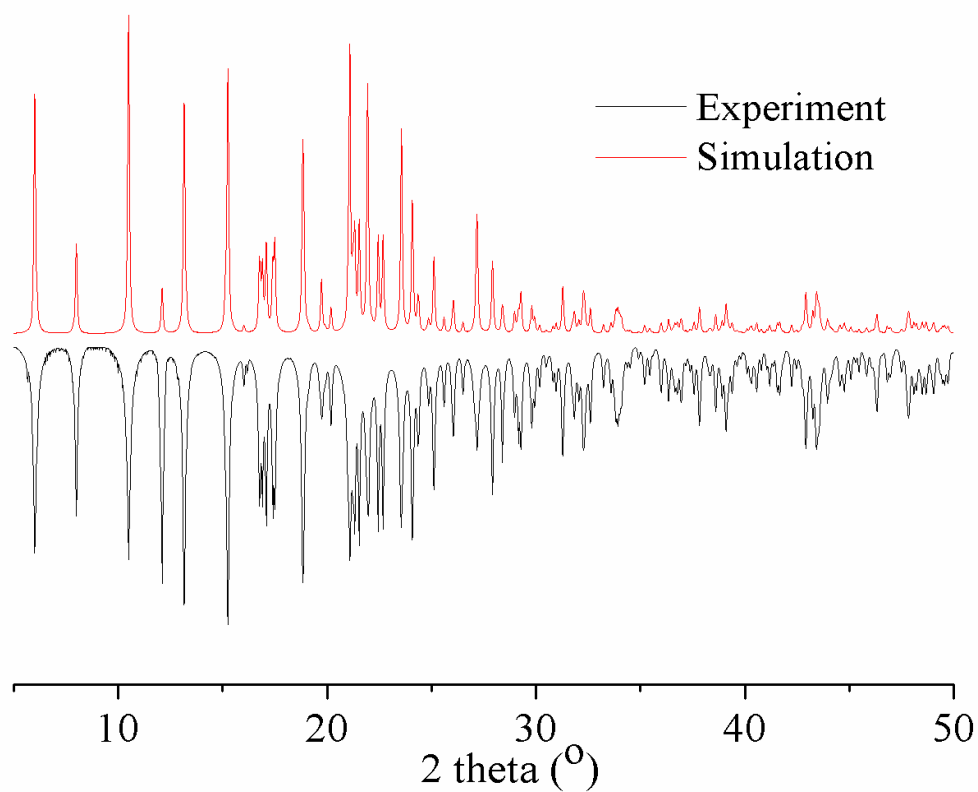

**Figure S4** X-Ray power diffraction profiles of complex **4**.

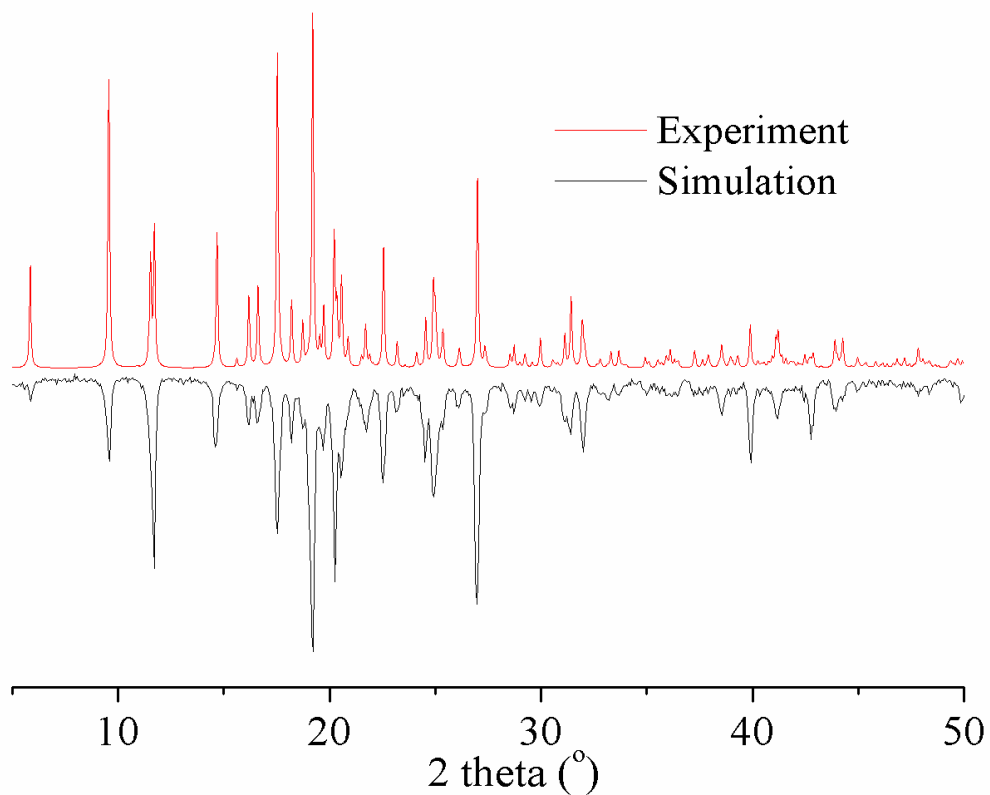

**Figure S5** X-Ray power diffraction profiles of complex **5**.
